# Supplementary material for: Crosstalk between androgen receptor and WNT/β-catenin signaling causes sex-specific adrenocortical hyperplasia in mice
Source: PubMed Central journal article supplement (PMC10184674; doi:10.1242/dmm.050053), 2023-05-10
Supplement: dmm-16-050053-s1.pdf [file dmm-16-050053-s1.pdf]

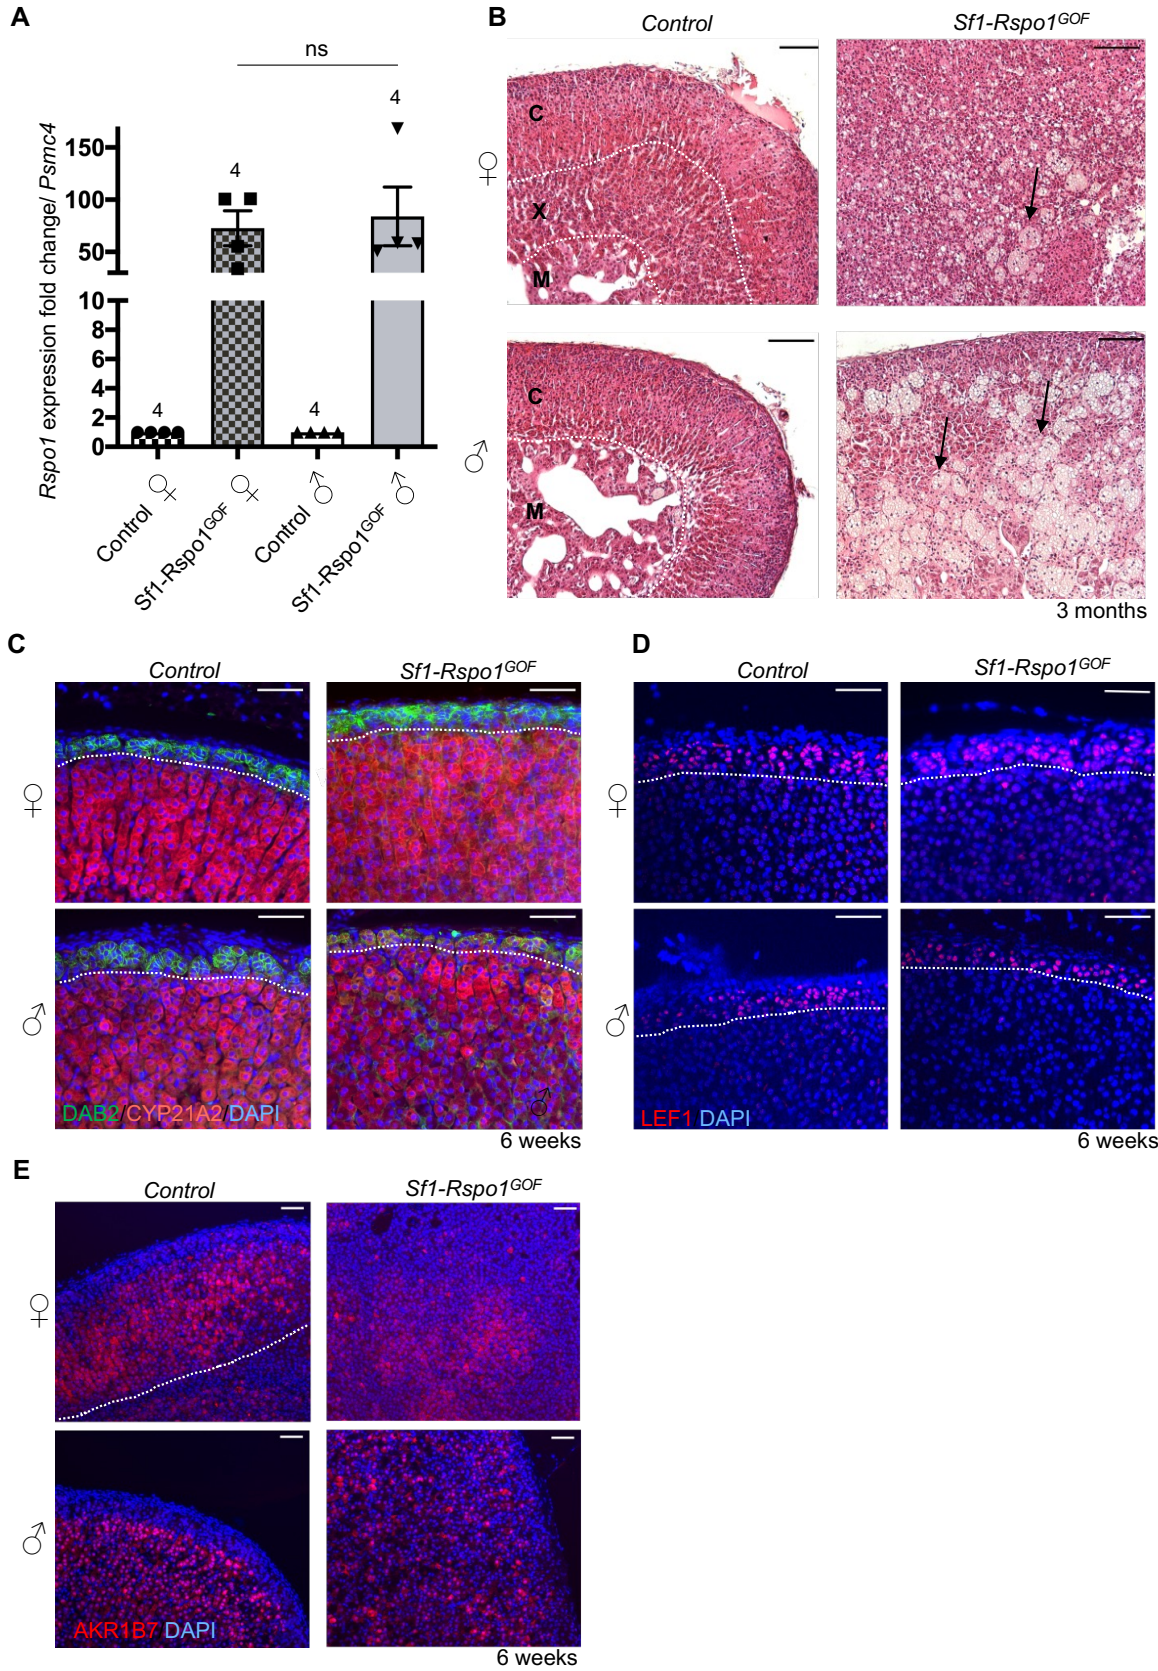

**Fig. S1. Characterization of RSPO1 overexpression and its effects on adrenocortical cells.**

A) RT-qPCR analysis of *Rspo1* expression relative to *Psmc4* in adrenals from 6-week-old mice, shown as mean fold change in *Sfl-Rspo1<sup>GOF</sup>* adrenals compared to sex-matched controls. The numbers below the graph columns represent number of samples in each group (n). The numbers above the graph columns represent number of samples in each group (n=4). Statistical analysis was performed using unpaired two-tailed t-test (P=0.7442). Error bars represent the standard error of the mean (SEM). B) H&E staining of adrenal sections from 3-month-old mice. Black arrows point to the vacuolated cells forming degenerative lesions. C: cortex, X: x-zone, M: medulla. Scale bar: 100  $\mu$ m. C) Immunofluorescence staining for DAB2 (marker of the zG) and CYP21A2 (marker of adrenal steroidogenic cells), using adrenal sections from 6-week-old mice. Scale bar: 50  $\mu$ m. D) Immunofluorescence staining for LEF1 (marker of the zG) on adrenal sections from 6-week-old mice. Scale bar: 50  $\mu$ m. E) Immunofluorescence staining for the aldo-keto reductase AKR1B7 using adrenal sections from 6-week-old mice. Scale bar: 50  $\mu$ m.

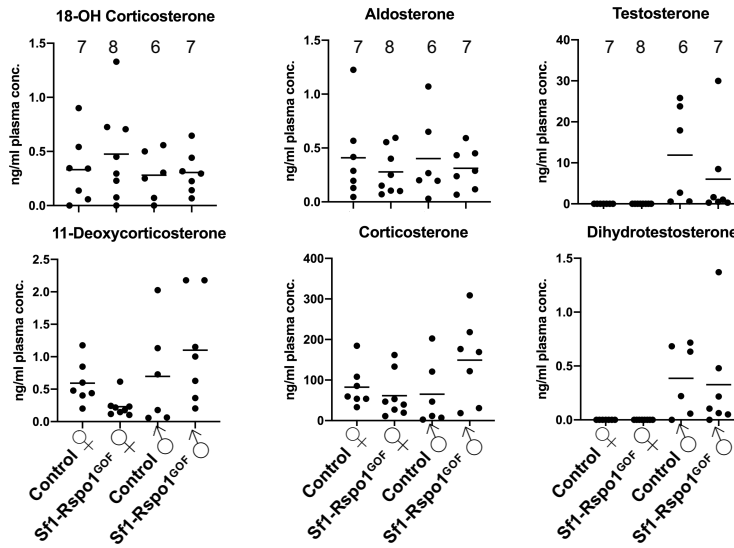

**Fig. S2. Plasma steroid levels.** Quantification of adrenal and testicular steroids in the plasma of control and *Sf1-Rspo1*<sup>GOF</sup> mice at 6 weeks of age by liquid chromatography paired with tandem mass spectrometry (LC-MS/MS). The numbers above the graph columns represent number of samples in each group (n).

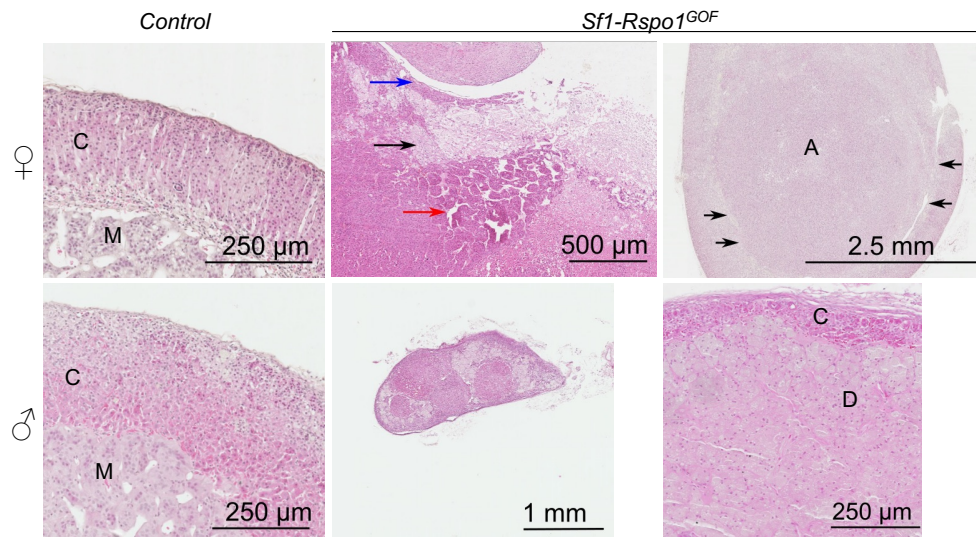

**Fig. S3. Ectopic RSPO1 expression leads to the development of nodules and neoplasia in aging animals.** On the top panel, representative H&E images of 12-month-old female control and *Sf1-Rspo1<sup>GOF</sup>* adrenals are shown. Both female *Sf1-Rspo1<sup>GOF</sup>* adrenals have tumors: in the middle, the adrenal is completely effaced by an adrenocortical carcinoma. Capsular invasion (blue arrow) and areas of extended necrosis (black arrow) and nest-like cell organization (red arrow) can be seen. On the left, the adrenal harbors a well-circumscribed adrenocortical adenoma. On the bottom panel, representative H&E staining on 12-month-old male control and *Sf1-Rspo1<sup>GOF</sup>* adrenals shows the extensive degeneration and cortical thinning paired with incidences of nodular hyperplasia in the *Sf1-Rspo1<sup>GOF</sup>* adrenals. C: cortex, M: medulla, D: degeneration, A: adenoma.



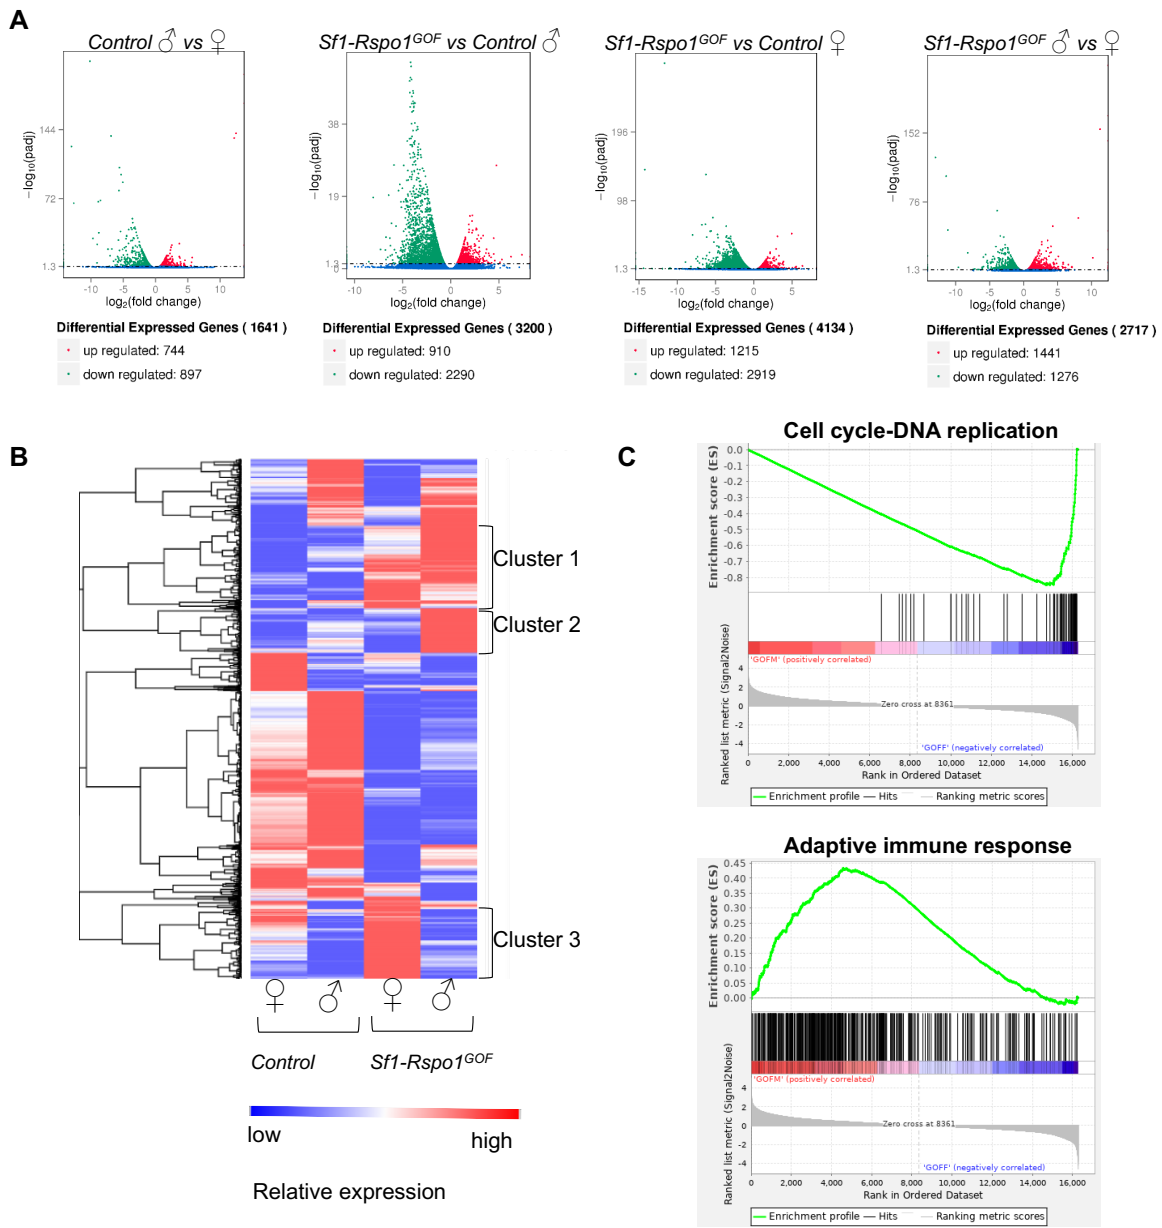

**Fig. S4. Analysis of differential gene expression between groups.** A) Volcano plots differentially expressed genes between pairs of experimental groups. B) Hierarchical clustering and heatmap representation of differential gene expression among control and *Sf1-Rspo1*<sup>GOF</sup>, male and female adrenals. Relative expression differences are shown in color code. C) Enrichment plots for gene ontology (GO) terms produced by GSEA analysis comparing male ('GOFM') to female ('GOFF') *Sf1-Rspo1*<sup>GOF</sup> adrenals.

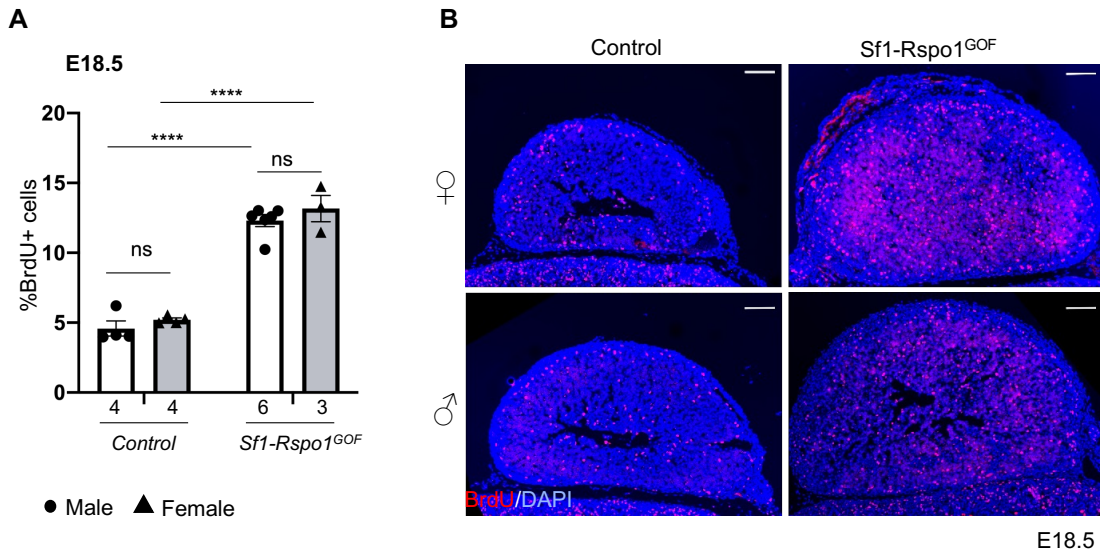

**Fig. S5. Male and female  $Rspo1^{GOF}$  embryos display equal rates of adrenocortical cell proliferation.** A) BrdU proliferation analysis shown as mean percentage of proliferating cells over total number of cells in the adrenal cortex of E18.5 mouse embryos (error bars represent SEM). The numbers below the graph columns represent number of samples in each group (n). Statistical analysis was conducted using ordinary two-way ANOVA followed by Tukey's multiple comparison's test. Adjusted p-values: Control F vs  $Sf1-Rspo1^{GOF}$  F:  $P < 0.0001$ , Control M vs  $Sf1-Rspo1^{GOF}$  M:  $P < 0.0001$ ,  $Sf1-Rspo1^{GOF}$  F vs  $Sf1-Rspo1^{GOF}$  M:  $P = 0.6680$ . B) Representative images of BrdU immunostaining in E18.5 adrenals. Scale bars: 100  $\mu$ m.

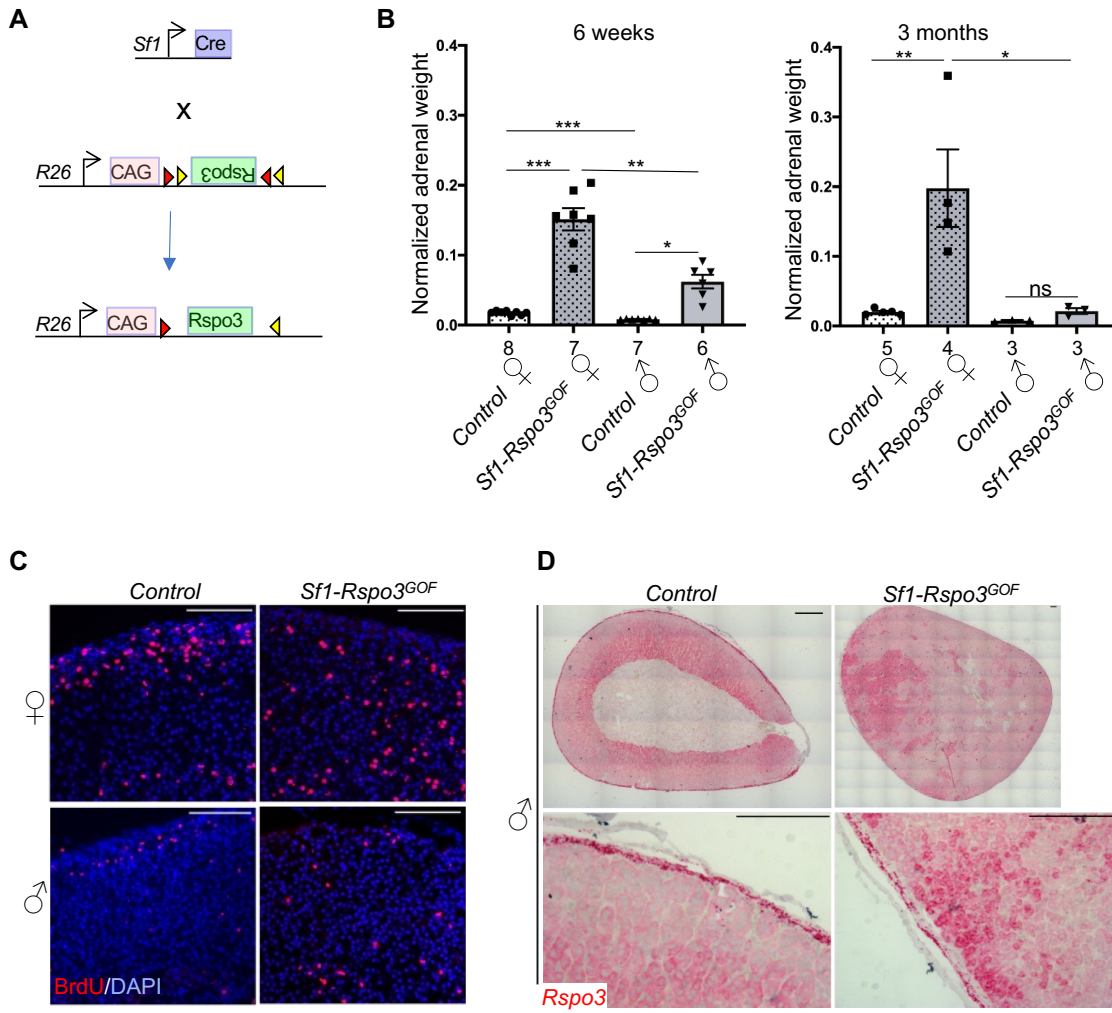

**Fig. S6. Ectopic RSPO3 expression results in female-specific hyperplasia.** A) Schematic representation of the genetic strategy to overexpress RSPO3 in adrenocortical cells using Sfl-Cre. B) Mean adrenal weight normalized to total body weight from 6 week and 3-month-old male and female control or *Sfl-Rspo3<sup>GOF</sup>* adrenals. Error bars represent SEM. The numbers below the graph columns represent number of samples in each group (n). Statistical analysis for 6 weeks was conducted using Welch's one-way ANOVA followed by the Dunnett's T3 multiple comparisons test. Adjusted P-values: Control F vs *Sfl-Rspo3<sup>GOF</sup>* F: P= 0.0008, Control F vs Control M: P=0.0001, *Sfl-Rspo3<sup>GOF</sup>* F vs *Sfl-Rspo3<sup>GOF</sup>* M: P=0.0043, Control M vs *Sfl-Rspo3<sup>GOF</sup>* M: P=0.0130. Statistical analysis for 3 months was conducted with one-way standard ANOVA followed by Tukey's post-hoc test. Adjusted P-values: Control F vs *Sfl-Rspo3<sup>GOF</sup>* F: P=0.0039, *Sfl-Rspo3<sup>GOF</sup>* F vs *Sfl-Rspo3<sup>GOF</sup>* M: P=0.0102, Control M vs *Sfl-Rspo3<sup>GOF</sup>* M: P=0.9910. C) BrdU analysis to label proliferative cells in control and *Sfl-Rspo3<sup>GOF</sup>* adrenal at 6 weeks of age. D) In situ hybridization for *Rspo3* using the RNA Scope method (*Rspo3* mRNA shown as red dots). Representative images represent control and *Sfl-Rspo3<sup>GOF</sup>* adrenals from male 6-week-old animals. Scale bars: 50  $\mu$ m.



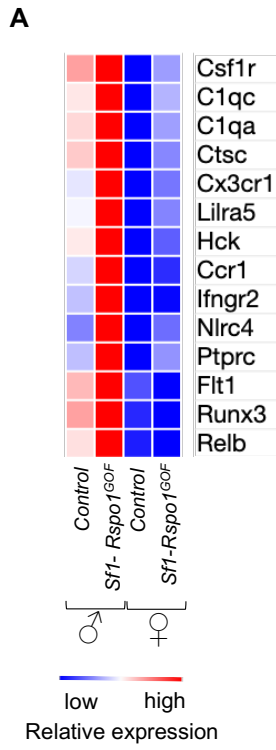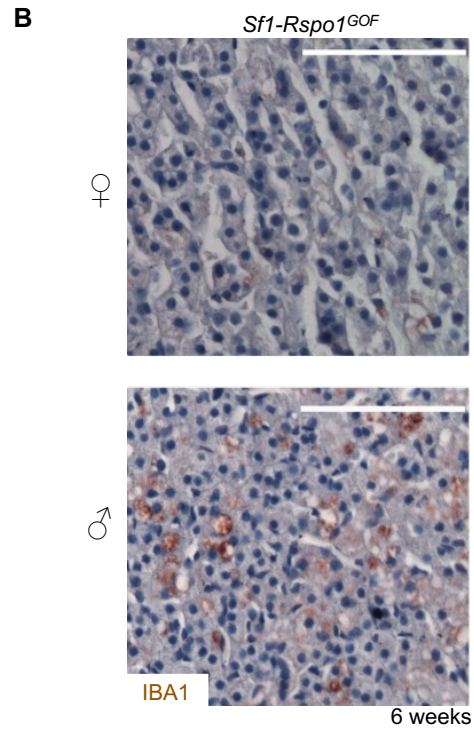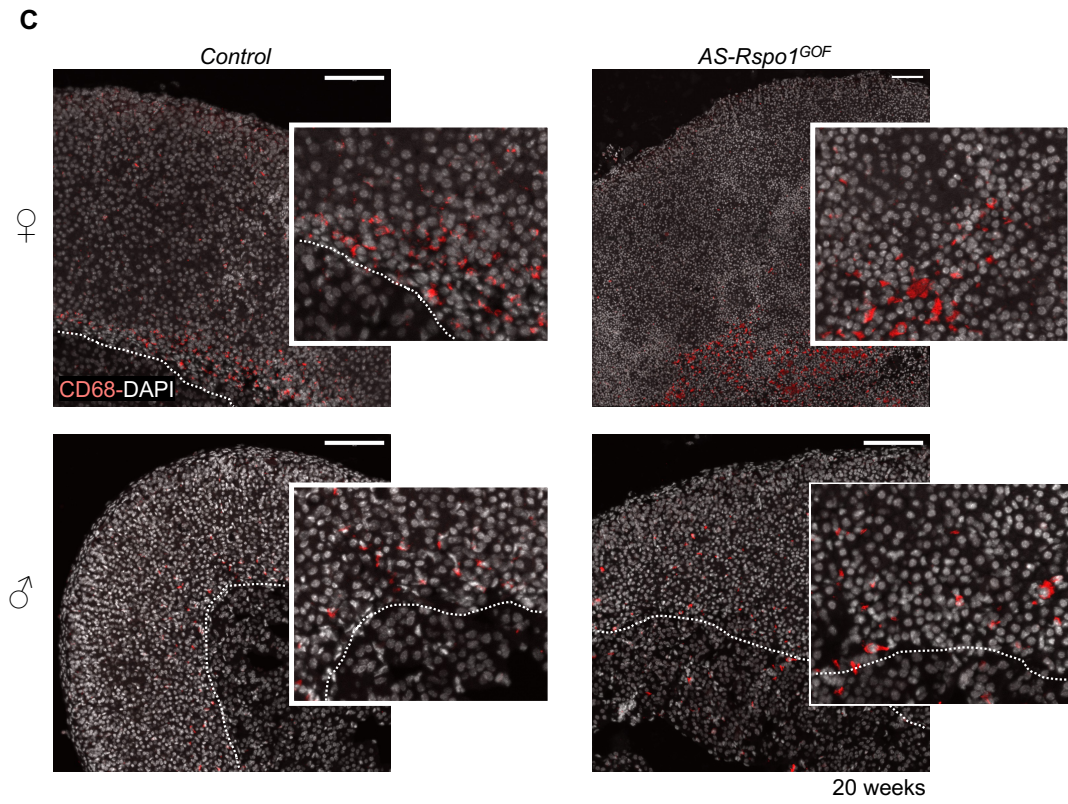

**Fig. S7. Degenerative lesion formation by macrophages in the male *Sfl-Rspo1<sup>GOF</sup>* adrenal cortex.** A) Heatmap representation of relative expression differences (shown in color code) for genes expressed in macrophages/monocytes or pan-immune cells. B) Immunohistochemical staining for IBA1, a macrophage marker enriched in StAR deficient adrenals. Scale bar: 50  $\mu\text{m}$ . C) Immunofluorescence staining for macrophage marker CD68 on 20-week-old adrenal cortex from control and *AS-Rspo1<sup>GOF</sup>* animals. Scale bar: 100  $\mu\text{m}$ .

**A**

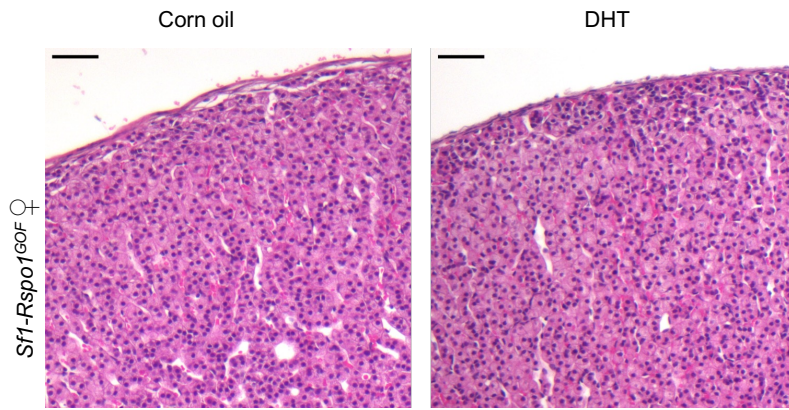

**B**

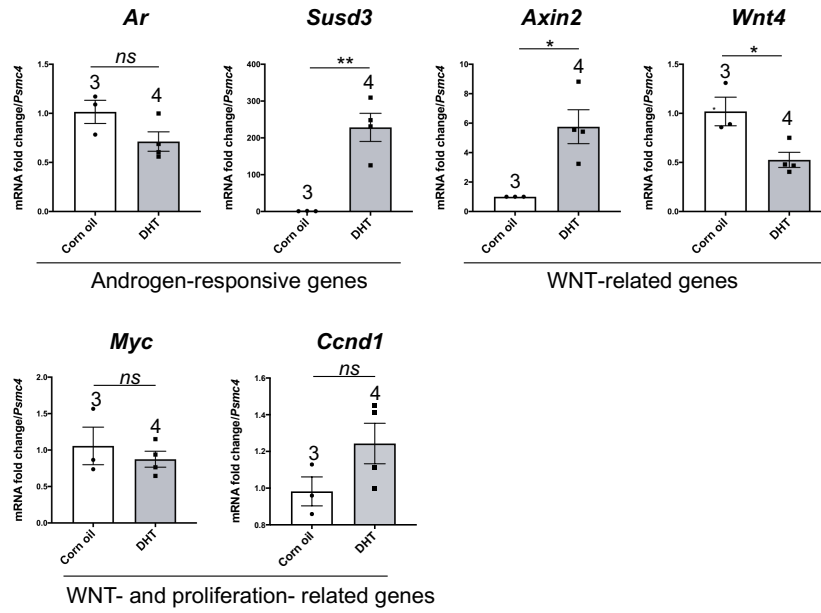

**C**

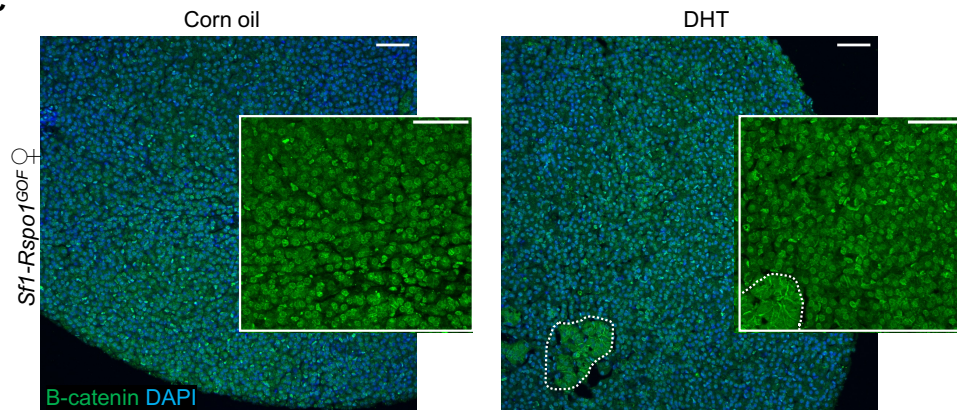

**Fig. S8. Effect of DHT treatment on histology and expression in *Sfl-Rspo1<sup>GOF</sup>* adrenals.**

A) H&E staining on adrenal sections from 6-week-old female mice treated with corn oil or DHT during puberty. Scale bar: 50  $\mu$ m. B) RT-qPCR analysis of gene expression for WNT signaling target genes (*Wnt4*, *Axin2*), known target genes of WNT signaling also related to proliferation (*Myc*, *Ccnd1*), and genes possibly related to androgen receptor signaling (*Ar*, *Susd3*). Graphs represent mean fold expression change comparing corn oil to DHT treated adrenals (normalized to *Psmc4* expression). Error bars represent SEM. The numbers above the graph columns represent number of samples in each group (n). Statistical analysis was conducted with unpaired t-test. P values: 0.1056 (*Ar*), 0.0173 (*Axin2*), 0.0228 (*Wnt4*), 0.0040 (*Susd3*), 0.5019 (*Myc*), 0.1347 (*Ccnd1*). DHT: dihydrotestosterone. C) Immunofluorescence staining for  $\beta$ -catenin on adrenal sections from 6-week-old female mice treated with corn oil or DHT during puberty. Inserts represent zoomed-in areas of the inner cortex. Scale bar: 100  $\mu$ m



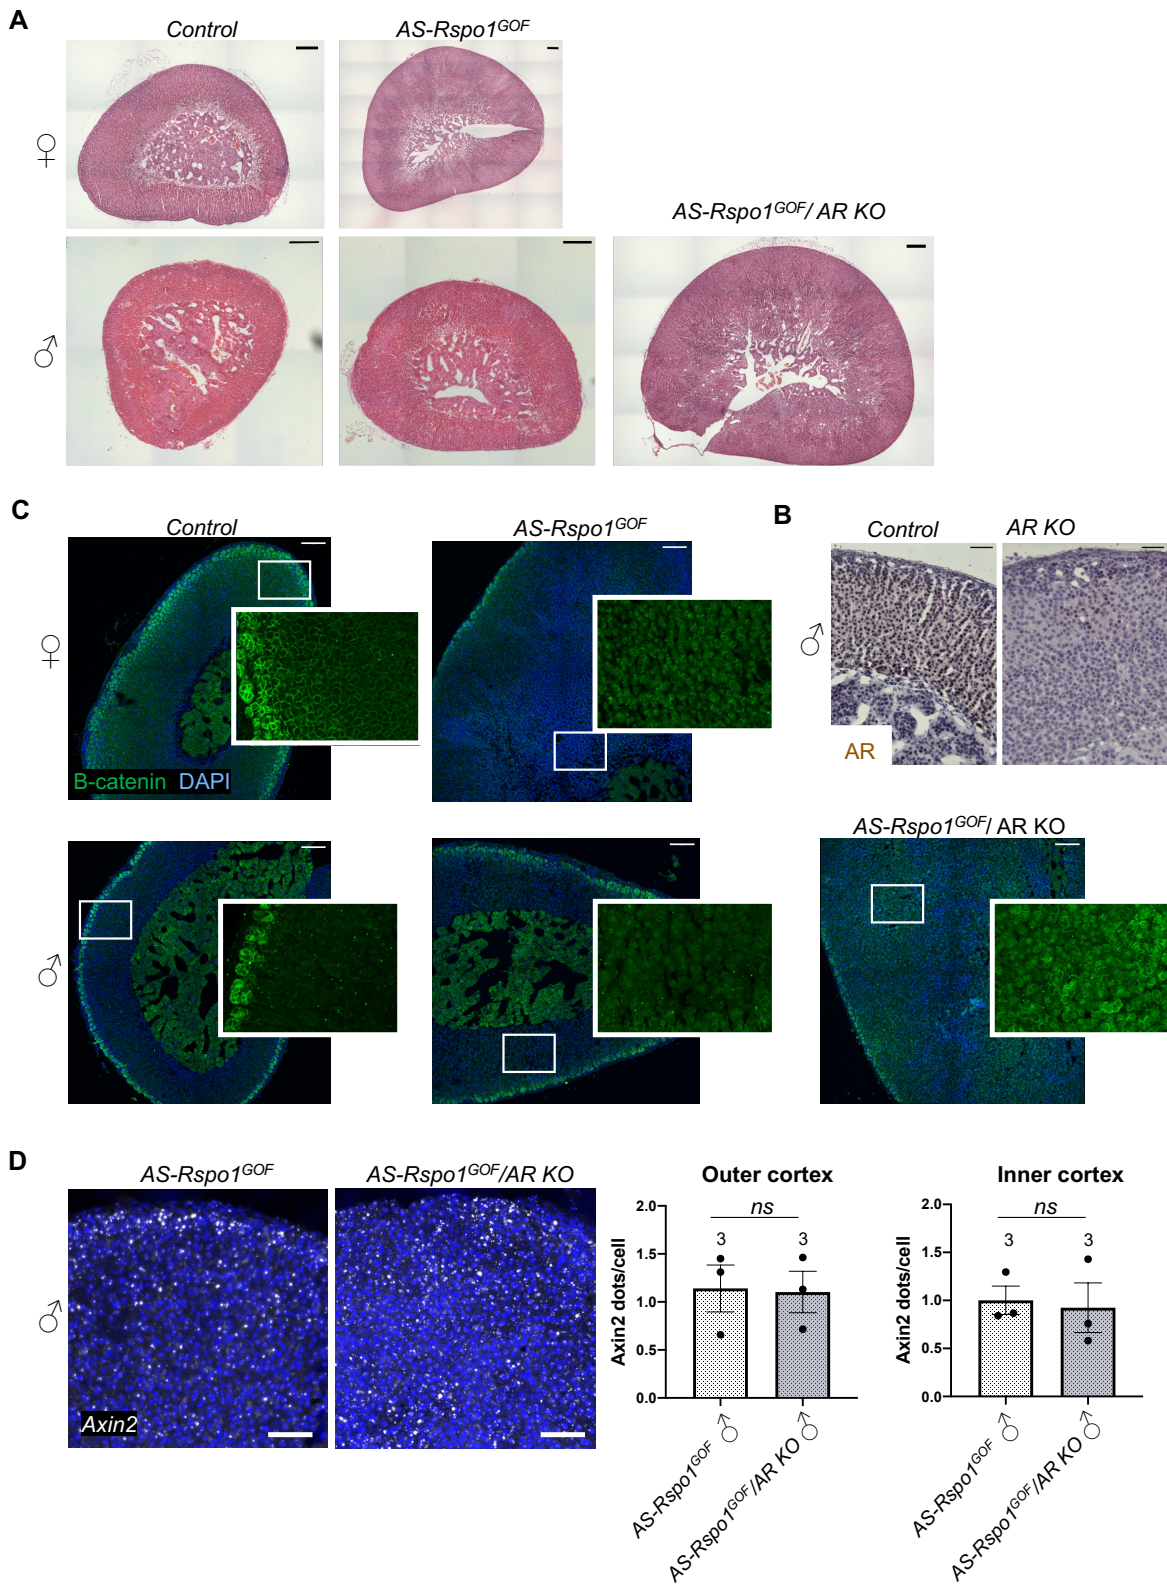

**Fig. S9. Effect of *Ar* knock-out in adrenocortical histology, AR expression, and WNT signaling.** A) Hematoxylin and eosin staining of adrenal sections at 20 weeks of age. Scale bar: 200  $\mu$ m. B) Representative images of immunohistochemistry to detect AR in control and *Ar KO* male adrenals at 20 weeks of age. White arrows point to a few nuclei that display residual expression of AR in the *Ar KO* adrenals. Scale bar: 50  $\mu$ m. C) Immunofluorescence staining for  $\beta$ -catenin on adrenal sections at 20 weeks of age. Inserts represent zoomed-in areas of the inner cortex. Scale bars: 100  $\mu$ m. D) Quantification of *Axin2* expression on sections from *AS-Rspo1<sup>GOF</sup>* and *AS-Rspo1<sup>GOF</sup>/AR KO* male adrenals using RNA Scope single-molecule (ISH). The numbers above the graph columns represent number of samples in each group (n=3). Two-tailed unpaired t-test was used to determine statistical significance. Scale bars: 50  $\mu$ m.

**Table S1. List of primers used in this study.**

| Gene                         | Forward primer                     | Reverse primer 1               | Reverse primer 2         | Purpose    |
|------------------------------|------------------------------------|--------------------------------|--------------------------|------------|
| <i>Psmc4</i>                 | TTCTTGGAAGCTGTGG<br>ATCA           | TCAGGATGCGCACATAATA<br>GTT     |                          | qPCR       |
| <i>Rspo1</i>                 | CAGTGA CTATGCGGCT<br>TGG           | AGAGCTCACAGCCCTTGG             |                          | qPCR       |
| <i>Susd3</i>                 | GACTGTGCTCATATTCC<br>ACTGC         | TAAAGCCGAAGGTCTCAT<br>GC       |                          | qPCR       |
| <i>Ar</i>                    | GTGCCACCCAAAGGA<br>CT              | CCTTTTCCCAATGCCTCAG<br>CT      |                          | qPCR       |
| <i>Pena</i>                  | CTAGCCATGGGCGTGA<br>AC             | GAATACTAGTGCTAAGGT<br>GTCTGCAT |                          | qPCR       |
| <i>Polal</i>                 | TGCACTGTGGATAAAT<br>TCTCAAG        | CAGTGAGGTTTGACCCAT<br>CC       |                          | qPCR       |
| <i>Cdc6</i>                  | TCCGTGTGTGGACGTA<br>AAAC           | GGAGTGTTGCACAGGTTG<br>TC       |                          | qPCR       |
| <i>E2f8</i>                  | CCAGAAATCAGCCCAA<br>ACA            | GCAGACTGCTCAGCCTCT<br>AAG      |                          | qPCR       |
| <i>Cnd1</i>                  | GCAGAAGGAGATTGTG<br>CCATCC         | AGGAAGCGGTCCAGGTAG<br>TTCA     |                          | qPCR       |
| <i>Myc</i>                   | CCTAGTGCTGCATGAG<br>GA GA          | TCCACAGACACCACATCA<br>ATTT     |                          | qPCR       |
| <i>Rspo1</i><br>transgene    | TGTTCAITGTCGGGGTT<br>GCGG          | CGACCTGCAGCCCAAGCT<br>AG       |                          | Genotyping |
| <i>Rosa26</i>                | AGGGAGCTGCAGTGG<br>AGTAG           | AGCCTGCCCAGAAGACTC<br>CC       |                          | Genotyping |
| Sfl1-Cre                     | CCCACCGTCAGTACGT<br>GAGATATC       | CGCGGTCTGGCAGTAAAA<br>ACTAT    |                          | Genotyping |
| <i>Rspo3</i><br>transgene    | CGGATTAATCGATCC<br>CG              | CCTATCTGCTTCATGCCAA<br>TCC     |                          | Genotyping |
| <i>Wt1-Sox9</i><br>transgene | CATCCGAGCCGCACCT<br>CATG           | GCTGGAGCCGTTGACGCG             |                          | Genotyping |
| <i>Cyp11b2-<br/>Cre</i>      | GAGCTGGGGCCCATTT<br>TCAGG          | GCTCCAGGTGCATCCGAC<br>GG       | AACTTGCACCAT<br>GCCGCCCA | Genotyping |
| <i>Sry</i>                   | TTGTCTAGAGAGCATG<br>GAGGGCCATGTCAA | AACTTGCACCATGCCGCC<br>CA       |                          | Genotyping |
| <i>Ar flox</i>               | AGCCTGTATACTCAGTT<br>GGGG          | AATGCATCACATTAAGTTG<br>ATACC   |                          | Genotyping |

**Table S2. List of antibodies used in this study.**

| <b>Primary antibodies</b>          | <b>Source</b>          | <b>Reference</b> | <b>Dilution</b> |
|------------------------------------|------------------------|------------------|-----------------|
| Anti-Tyrosine hydroxylase (TH)     | Sigma-Aldrich          | AB152            | 1:200           |
| Anti-CYP21A2                       | Sigma-Aldrich          | HPA048979        | 1:200           |
| Anti-AKR1B7 (M13)                  | Santa Cruz             | sc-27763         | 1:200           |
| Anti-3BHSD (P18)                   | Santa Cruz             | sc-30820         | 1 :200          |
| Anti-AR                            | Abcam                  | ab108341         | 1 :200          |
| Anti-IBA1                          | Proteintech            | 10904-1-AP       | 1 :200          |
| Anti-CD68                          | Proteintech            | 28058-1-AP       | 1:2000          |
| Anti-DAB2 (E-11)                   | Santa Cruz             | sc136964         | 1:50            |
| Anti-BrdU (3D4)                    | BD Pharmingen          | 555627           | 1:100           |
| <b>Secondary antibodies</b>        | <b>Source</b>          | <b>Reference</b> | <b>Dilution</b> |
| Donkey anti-rabbit Alexa Fluor 647 | Invitrogen             | A31573           | 1:400           |
| Donkey anti-goat 555               | Invitrogen             | A21432           | 1:400           |
| Donkey anti-mouse Alexa Fluor 555  | Invitrogen             | A31570           | 1:400           |
| Biotinylated donkey anti-rabbit    | Jackson Immunoresearch | 711.065.152      | 1:400           |
| Donkey anti-rabbit Alexa Fluor 555 | Invitrogen             | A31572           | 1:400           |
| Donkey anti-mouse Alexa Fluor 647  | Invitrogen             | A31571           | 1:400           |
